# Supplementary material
Source: PubMed Central journal article supplement (PMC18298)
Supplement: pnas_97_9_4712__6.pdf [file pnas_97_9_4712__6.pdf]

Table 3. Linkage of nurse shark class II , and class Ia (segregation of class I and class II maternal alleles; class II sequence analysis)

|     |    | class I |        | class II           |              |
|-----|----|---------|--------|--------------------|--------------|
|     |    | 1       | 3      | (allele)           | (allele)     |
|     | Ma | U<br>L  | +<br>- | U(3)<br>L(1)       | U(2)<br>L(1) |
|     | 1  | U       | +      | L(1)               | U(2)         |
|     | 2  | L       | -      | U(3)*              | L(1)*        |
| R → | 3  | U       | +      | U(3)               | U(2)         |
|     | 4  | L       | -      | U(3)/L(1)          | L(1)         |
|     | 5  | U       | +      | L(1)               | U(2)         |
|     | 6  | U       | +      | L(1)               | U(2)         |
|     | 7  | L       | -      | U(3)*              | L(1)*        |
|     | 8  | L       | -      | U(3)               | L(1)         |
|     | 9  | U       | +      | L(1)               | U(2)         |
|     | 10 | U       | +      | L(1)/<br>M(DBA2,3) | U(2)*        |
|     | 11 | L       | -      | U(3)*              | L(1)*        |
|     | 12 | U       | +      | L(1)               | U(2)         |
|     | 13 | U       | +      | L(1)/<br>M(DBA3,6) | U(2)*        |
|     | 14 | U       | +      | L(1)               | U(2)         |
|     | 15 | U       | +      | L(1)               | U(2)         |
|     | 16 | L       | -      | U(3)*              | L(1)*        |
|     | 17 | L       | -      | U(3)*              | L(1)*        |

\* Cases where a single band was detected on a Southern blot in Fig. 3.

U, upper band; L, lower band; M, middle band; +, presence of band; -, absence of band; R, potential recombinant; Ma, Mother.

Class II alleles are *Gici-DAA\*01(1)* and *Gici-DAA\*03(3)*.

Class II alleles are *Gici-DAB\*01(1)* and *Gici-DAB\*02(2)*.
